1 **High-magnitude innovators as keystone individuals in the evolution of**  
2 **culture**

3

4 Michal Arbilly

5 Department of Biology, Emory University, Atlanta, GA 30322, USA

6 [michalarbilly@gmail.com](mailto:michalarbilly@gmail.com)

7

8 Keywords: keystone individuals, cultural evolution, innovation magnitude, socially induced

9 innovation

10

11

12

13

14

15

16

17

18

19

20

21

22

23

24 **Abstract**

25 Borrowing from the concept of keystone species in ecological food webs, a recent focus in  
26 the field of animal behaviour has been keystone individuals: individuals whose impact on  
27 population dynamics is disproportionately larger than their frequency in the population. In  
28 populations evolving culture, such may be the role of high-magnitude innovators:  
29 individuals whose innovations are a major departure from the population's existing  
30 behavioural repertoire. Their effect on cultural evolution is twofold: they produce  
31 innovations that constitute a 'cultural leap', and, once copied, their innovations may induce  
32 further innovations by conspecifics (socially induced innovations), as they explore the new  
33 behaviour themselves. I use computer simulations to study the co-evolution of independent  
34 innovations, socially induced innovations, and innovation magnitude, and show that while  
35 socially induced innovation is assumed here to be less costly than independent innovation,  
36 it does not readily evolve. When it evolves, it may in some conditions select against  
37 independent innovation and lower its frequency, despite it requiring independent  
38 innovation in order to operate; at the same time, however, it leads to much faster cultural  
39 evolution. These results confirm the role of high-magnitude innovators as keystones, and  
40 suggest a novel explanation for low frequency of independent innovation.

41

42

43

44

45

46

## 47 **Introduction**

48 The concept of keystone species, originally suggested by Robert Paine to describe species  
49 whose impact on their ecosystem is much greater than their part in it [1–3], has been  
50 recently adopted by animal behaviour researchers, to describe individuals whose impact  
51 on the population they live in is much greater than their proportion in it, and whose  
52 removal from the population would result in a profound and lasting effect on group  
53 dynamics [4]. While the general concept is relatively new, effects of such individuals have  
54 been noted and documented over decades and across social species, by more situation-  
55 specific titles, such as dominants, tutors, or leaders (see detailed review in Modlmeier et al.  
56 2014). Recent studies utilizing the keystone individuals concept have shown, for example,  
57 that the presence of a few bold individuals in colonies of social spiders, and the quality of  
58 the knowledge these individuals possess affects the colony's foraging behaviour and  
59 success [5,6], and that an ant colony's nest site selection is faster and more accurate when  
60 it includes highly exploratory individuals [7]. The keystone framework is also gaining some  
61 traction in conservation biology: it has recently been proposed that identification of  
62 keystone individuals and analysis of their effect on the population is valuable in  
63 conservation and management of social species [8].

64

65 In the context of cultural evolution, we may consider innovators of behaviours that spread  
66 in a population, and individuals who serve as a popular copying model, to be keystones [4].  
67 Theoretical and experimental work assessing the role of innovation in cultural evolution  
68 has focused on the conditions favouring social learning over innovation (or individual  
69 learning) and vice versa (e.g. [9–17]), as well as on the diffusion of innovations [18–20].

70 Lately, a series of models turned the spotlight onto the way different types of innovations  
71 may shape the evolution of culture [21–23]. The different nature that innovations may have  
72 pertains to a longstanding dispute in the animal behaviour literature. While it is intuitively  
73 clear that not all innovations are similar in their inception and impact, how can we define  
74 the differences between them in general terms?

75

76 In a recent paper, we approached this issue by describing behavioural innovations as  
77 measured by their magnitude [24]. Relying on a previous definition [25], we suggested that  
78 any new behaviour, no matter how similar to behaviours already in the populations'  
79 behavioural repertoire, should be considered an innovation; however, we argued that these  
80 innovations may differ in how close to or far from the population's mean behaviour they  
81 are. Innovations that are far from the mean are considered high-magnitude innovations,  
82 while innovations that are close to the mean are considered of low-magnitude (see detailed  
83 discussion in [24]). Offering a great increase in the population's fitness, high-magnitude  
84 innovations that spread in the population may therefore be viewed as a cultural 'leap' [21].

85

86 High-magnitude innovations, by definition, differ significantly from familiar behaviours.

87 They may include the introduction of a new object to interact with [26], a new territory to  
88 forage in [27], a new feeding method to utilize [28], or a new song to replicate [29].

89 Viewing others interact with an unfamiliar object may allow neophobic individuals to  
90 overcome their fear, or simply draw attention to an object that copiers have not noticed  
91 before [30,31]. Thus, high-magnitude innovations allow copiers of the innovation to

92 explore a new domain and perhaps modify it by innovating themselves. Models focusing on

93 the effect of different innovation types on human cultural evolution have utilized the latter  
94 idea, suggesting to account for the punctuated evolutionary pattern found in the human  
95 artifact archeological record [21–23]. High-magnitude innovators may therefore not only  
96 serve as keystone individuals by generating cultural leaps, but also by facilitating socially  
97 induced innovations, that further modify their own.

98

99 In this study, I expand upon our previous work on the magnitude of innovation in social  
100 animals [24], to include cultural evolution. I investigate whether a trait allowing socially  
101 induced innovation can evolve, examine the effect of such a trait on the evolution of  
102 independent innovation and on the magnitude of innovation, and finally, analyze how all  
103 these traits interact to shape the progression of culture.

104

## 105 **THE MODEL**

106 I simulated a population of individuals genetically varying in their (1) tendencies to  
107 innovate and to copy others; (2) innovation magnitude, and (3) tendency to modify high-  
108 magnitude innovations they have copied. A generation's life began with a series of  $T = 10$   
109 discrete learning steps, in each of them individuals acquire one new behaviour either by  
110 innovating, or by copying the innovations that others produced during that specific  
111 learning step  $t$  ( $0 < t \leq T$ ). Individuals who copied high magnitude innovations in step  $t$   
112 could, based on their genetic tendency, be “inspired” to innovate in the next learning step  
113 ( $t+1$ ), to produce a modification of the copied innovation. This modified innovation could  
114 be copied by others during that step ( $t+1 \leq T$ ) as any innovation, and could serve as a basis  
115 for further socially induced innovations in the next learning step ( $t+2 \leq T$ ), in the same

116 manner. After the  $T$  steps of the learning phase, individuals applied the behaviours they  
117 have acquired, with greater weight given to higher-paying behaviours. Individuals then  
118 produced offspring in proportion to the relative payoff they have accumulated during their  
119 lifetime, and died. The mean of the highest paying behaviours learned by parents was  
120 defined as their generation's cultural contribution, and considered the new generation's  
121 behavioural baseline for cultural evolution calculations.

122

### 123 *The population*

124 A population of  $n = 100$  individuals is modeled, with each individual characterized by three  
125 focal genes:  $L$  (Learning gene),  $I$  (Innovation magnitude gene), and  $C$  (socially induced  
126 innovation gene). The learning gene,  $L$ , determined the probability the individual will, at  
127 each learning step, produce an independent innovation, or copy a conspecific's innovation.  
128 There were 11 possible alleles in this gene: 0, 0.1, 0.2 ... 1, where 0 coded for full-time  
129 copying, or social learning, 1 for full-time independent innovation, and all other alleles for a  
130 combination of the two (e.g. a carrier of the 0.3 allele spent 30% of the time, on average,  
131 copying, complemented by an average of 70% independent innovation). The innovation  
132 magnitude gene,  $I$ , affected how far from the population's norm an individual's innovations  
133 will be when innovating. There were again 11 possible alleles in this gene: 0, 0.1, 0.2 ..., 1,  
134 which represented standard deviations from the population's mean behaviour; this value  
135 was used to draw a value from a normal distribution whose mean was the population's  
136 mean behaviour, and standard deviation was the individual's  $I$  allele (see below). The  
137 socially induced innovation gene,  $C$ , determined the probability that, after copying a high-  
138 magnitude innovation, the copier will proceed to modify this innovation in its next learning

139 step. This gene included three alleles:  $C_0$  – for zero probability, i.e. no effect;  $C_{sqrt}$  – the  
140 square root of the individual’s probability to innovate as set by its  $L$  allele, i.e. an increase in  
141 innovation probability that is proportional to genetic tendency for independent innovation;  
142 and  $C_1$  – for a probability of 1, i.e. the individual is certain to innovate. Just like independent  
143 innovation, the magnitude of an individual’s socially induced innovation was determined  
144 by its genotype in the  $I$  gene.

145

#### 146 *Learning phase*

147 All individuals in the population had a limited number of learning steps  $T = 10$ . In each of  
148 these steps they acquired one new behaviour, either by innovation or by copying an  
149 innovation a conspecific has produced at that specific step (our previous model analyzing  
150 the case of  $T = 100$  found no significant differences between the two case, see Arbilly and  
151 Laland 2017). At the beginning of each step, it was determined for each individual whether  
152 it would innovate or copy, based on the probability dictated by its  $L$  genotype. Individuals  
153 who were to innovate generated a new behaviour. The value of this innovative behaviour  
154 (i.e. its payoff) was drawn from a normal distribution whose mean was the population’s  
155 mean behaviour, and whose standard deviation was the innovator’s allele in the  $I$  gene; for  
156 convenience, the population’s mean behaviour value was set to 0. Then, individuals who  
157 were to copy in this learning step, copied the behaviours generated by innovators. All  
158 innovations were ranked according to their value, and which innovations would be copied  
159 depended on the selectivity of social learning in the population (which was kept constant  
160 per population). The selectivity of social learning was controlled using the variable  $D$ ,  
161 defined as  $1 - [\text{the fraction of demonstrators copied}]$ . When selectivity was high (high  $D$ )

162 only innovations with the highest value were copied (e.g. when  $D = 0.9$  only the top 10% of  
163 innovation were copied); as the selectivity of social learning became lower, copying  
164 became more random (and was completely random at  $D = 0$ ).

165

166 In cases where individuals copied a high-magnitude innovation, defined as an innovation  
167 whose value was greater than 1 (putting it at a distance greater than one standard  
168 deviation from the population's mean behaviour), it was determined whether they will  
169 modify this innovation in the following learning step,  $t+1$ , based on their socially induced  
170 innovation ( $C$ ) allele. If they were to innovate, the magnitude of their innovation was set by  
171 their  $I$  allele. These individuals produced an innovation at the beginning of step  $t+1$  along  
172 with independent innovators (described above). However, for these socially induced  
173 innovators, the value of their innovation was added to the value of the high-magnitude  
174 innovation they copied in their previous learning step ( $t$ ), to yield a new innovation for step  
175  $t+1$ . This innovation was then ranked along with all innovations and copied by individuals  
176 who, in step  $t+1$ , are copying others, as described above. The choice to have socially  
177 induced innovation triggered only by the copying of high-magnitude innovations, rather  
178 than the copying of any innovation, was made in order to set these innovations apart from  
179 independent innovations (see Discussion).

180

181 *Application phase*

182 After acquiring the behaviours, individuals apply these behaviours and will tend to use  
183 them with a frequency directly proportional to the payoff they offer. To calculate the  
184 proportion of time allotted to each behaviour, and since payoffs can be negative as well as



185 positive, an exponential transformation of the form:

$$186 \quad p_x = \frac{e^{\sigma\beta_x}}{\sum_{i=1}^j e^{\sigma\beta_i}} \quad (1)$$

187 is used, where  $p_x$  is the proportion of time spent using behaviour  $x$ ,  $\beta_x$  is the payoff of  
188 behaviour  $x$ ,  $i = 1 \dots j$  are the behaviours the individual has acquired during its learning  
189 phase ( $j = T$ ), and  $\sigma$  is the application sensitivity: the degree to which agents can distinguish  
190 between payoffs in choosing which behaviours to apply. This value is the same for all  
191 agents. Following previous analysis [24],  $\sigma$  was set to its high value ( $\sigma = 3.3$ ), such that  
192 agents spend a higher proportion of their time applying the highest paying behaviour and  
193 little to no time applying low value behaviours. Note that due to the stochastic process used  
194 in the simulation to generate new behaviours, then unless there is no innovation in the  
195 population, behaviours  $1 \dots j$  will each be unique.

196

197 The payoff accumulated from applying the learned behaviours,  $W_A$  was then calculated by  
198 summing up the multiplications of each behaviour's payoff and the proportion of time  
199 spent applying it:

$$200 \quad W_A = \sum_{i=1}^j p_i \beta_i \quad (2)$$

201

### 202 *Selection and reproduction*

203 To calculate the total payoff to individuals in the population,  $W_T$ , the payoff obtained both  
204 during the learning phase,  $W_L$  (which is the sum of all payoffs of behaviours learned), and

205 during the application phase,  $W_A$ , was summed using a weight factor  $\alpha = 0.1$  to account for  
206 the relative time allocated to the learning phase compared to the application phase:

$$207 \quad W_T = \alpha W_L + (1 - \alpha) W_A.$$

(3)

208 Payoff received for behaviours was included in the learning phase payoff calculation (in the  
209 form of  $W_L$ ) regardless of whether they were applied, as it is assumed that agents perform  
210 behaviours when they are learning them, in order to experience their exact payoff.

211

212 Individuals then reproduced, producing a number of offspring proportional to their total  
213 payoff relative to the payoff of all other individuals in the population. Since the total payoff  
214 could be negative, we again use an exponential transformation of the form:

$$215 \quad r_y = \frac{e^{\lambda W_{T,y}}}{\sum_{k=1}^n e^{\lambda W_{T,k}}} \quad (4)$$

216 Where  $r_y$  is the probability of reproduction for individual  $y$ , and  $\lambda$  is the strength of  
217 selection. Following previous analysis [24],  $\lambda$  was set to its high value ( $\lambda = 3.3$ ), to generate  
218 strong selection: individuals who obtained higher total payoff had much higher chances to  
219 reproduce than individuals who obtained a lower payoff. Among the offspring, mutation  
220 occurred at a rate of  $\mu = 1/n$  in all genes. Mutation was random and the new variant was  
221 drawn from each gene's pre-defined allele pool.

222

223

224

225 *Cumulative culture*

226 After parents are selected, each parent's highest paying behaviour is recorded. The mean of  
227 all these behaviours from the parental generation is then counted as that generation's  
228 cultural contribution. This assumption accounts for a situation where a full repertoire of  
229 behaviours are transferred to the new generation, and not just one. This mean was then  
230 viewed as the new generation's mean behaviour. Since values of behaviour here are  
231 arbitrary, the actual value of this mean does not matter for purposes of innovation in the  
232 next generation, and furthermore, using it as the mean for the distribution from which the  
233 next generation draws innovations inflates cultural evolution rates, this cultural  
234 contribution was set aside and the actual mean used to draw innovations was zero for all  
235 generations. These cultural contributions were then used cumulatively to calculate the  
236 progress of cultural evolution. For example, if generation 1's contribution was 1.5, and  
237 generation 2's contribution was 0.5, the final value of culture for generation 2 was  
238  $1.5+0.5=2$ , and so on for following generations. The choice to use the mean of parents'  
239 highest paying behaviours is conservative: using only the single highest paying behaviour  
240 for each generation would have resulted in higher cultural rates.

241

242 **RESULTS**

243 *Evolution of socially induced innovation*

244 The allele frequency in socially induced innovation gene,  $C$ , changed with social learning  
245 selectivity,  $D$  (figure 1). The  $C_1$  allele, setting the probability of socially induced innovation  
246 to 1, had a clear advantage when the selectivity of social learning was low ( $D \leq 0.1$ ). The  
247 allele enhancing the probability of innovation,  $C_{sqr}$ , was also selected at  $D = 0$ , although at a

248 much lower frequency, with some advantage over  $C_0$  (allele coding for no effect); this  
249 advantage of  $C_{sqr}$  over  $C_0$  disappeared when  $D = 0.1$ . When selectivity was higher,  $C_1$  was  
250 found at low frequencies, while  $C_{sqr}$  and  $C_0$  appeared at similar frequencies (between 40%  
251 and 50% each). It should be noted that in that range of social learning selectivity  $D$ ,  
252 independent innovation rate, set by the  $L$  gene, was close to zero (figure 2a): in most  
253 generations individuals had an independent innovation rate of zero, therefore the  $C_{sqr}$   
254 allele would have no effect on them, similar to  $C_0$ .

255

### 256 *Rate of independent innovation in the presence of socially induced innovation*

257 A comparison of the genetic probability of independent innovation rate in the presence and  
258 in the absence of the  $C$  gene shows an effect changing with the selectivity of social learning,  
259  $D$  (figure 2a). While in the absence of  $C$  the genetic probability represents the expected  
260 probability of innovation in the population, in the presence of  $C$ , the actual rate of  
261 independent innovation may be lower than the genetic probability, as individuals may use  
262 some of their learning steps for socially induced innovation, instead of drawing between  
263 innovation and social learning based on their  $L$  allele. When the selectivity of social  
264 learning was at its lowest – where copying is completely random – socially induced  
265 innovation significantly decreased the rate of independent innovation. When social  
266 learning selectivity was poor while still eliminating the worst innovations ( $D = 0.1$ ), the  
267 rate of independent innovation was the same with and without  $C$ . When selectivity was  
268 higher but still in the low range ( $0.2 \leq D \leq 0.5$ ), the rate of independent innovation was  
269 slightly higher in the presence of the  $C$  gene. As the effect is very small, and due to the  
270 complicated frequency-dependent interaction between the three genes, it is difficult to

271 determine whether this is due to noise created by drift in the  $C$  gene, because socially  
272 induced innovations increase the benefit of independent innovation by increasing the  
273 competition, because carriers of the  $C_{sqr}$  allele benefit when also carrying an  $L$  allele with a  
274 value that is higher than zero, or some combination of these. However, more selective  
275 social learning resulted in similar, close to zero rates of independent innovation, with and  
276 without socially induced innovation.

277

### 278 *Magnitude of innovation in the presence of socially induced innovation*

279 When the selectivity of social learning was at its lowest – where copying was completely  
280 random – the magnitude of innovation was lower in the presence of socially induced  
281 innovation, although still very high (0.91 compared to 0.99; figure 2b). In the medium  
282 range of social learning selectivity, however, the magnitude of innovation was consistently  
283 higher in the presence of socially induced innovation, and as in the absence of socially  
284 induced innovation, decreased as selectivity in social learning increased.

285

### 286 *Cultural evolution*

287 Culture as measured by the accumulation of innovations, was higher when the selectivity in  
288 social learning ( $D$ ) was lower (figure 3). Socially induced innovation (the  $C$  gene) increased  
289 the rate of cultural evolution; this effect was found even in the case of random copying ( $D =$   
290  $0$ ), where the rate of independent innovation was much lower in the presence of socially  
291 induced innovation than in its absence (figure 2a).

292

293

## 294 **Discussion**

295 Socially induced innovations would seem to have a clear advantage: building on a known  
296 high-magnitude innovation, they offer the possibility of generating an even better  
297 innovation, with a lower risk compared to independent innovation. That is, even if the  
298 socially induced innovation resulted in a lower value behaviour compared to the  
299 independent innovation it was building upon, it is still less likely to be below the  
300 population's mean value of behaviour, unlike independent innovations. Still, socially  
301 induced innovations do not evolve when the selectivity of social learning is high: in that  
302 situation, others are likely to copy a high-magnitude socially induced innovation, without  
303 incurring the possible cost of producing a low-magnitude innovation. The cost for the  
304 socially induced innovator here is not only in having a lower value behaviour in its  
305 repertoire, but also in missing the chance of copying a better behaviour produced by  
306 someone else at that time step. This opportunity cost stems from the assumptions of the  
307 model, whereby individuals must perform the behaviour in order to learn it, know its exact  
308 payoff, and be "inspired" to modify it further with their own innovation.

309  
310 Most significant is the effect of socially induced innovation on the rate of independent  
311 innovation when copying was random ( $D = 0$ ). In that condition, in the absence of the  $C$   
312 gene, the rate of independent innovation is up to  $0.64 \pm 0.02$ , but when incorporating the  $C$   
313 gene, the rate was down to  $0.13 \pm 0.01$ . The magnitude of innovation was also somewhat  
314 lower. The dominating allele in the  $C$  gene at that time was  $C_1$ , guaranteeing a socially  
315 induced innovation whenever a high-magnitude innovation was copied. This combination  
316 of traits is, perhaps unsurprisingly, "safer" than a high rate of independent innovation

317 alone, for the reason discussed above. It should be noted that, while this result was found  
318 when social learning selectivity is low, the selectivity in application of behaviour is high,  
319 thus individuals do not blindly utilize behaviours; they are simply unable to judge the value  
320 of a behaviour without performing it first themselves. Regardless of the specific condition,  
321 it demonstrates how socially induced innovation may affect independent innovation, in a  
322 situation where independent innovation would otherwise be highly favoured. While  
323 lowering the rate of independent innovation, and the magnitude of all innovations, the *C*  
324 gene also lead here to a much higher rate of cultural evolution: socially induced innovations  
325 may be copied by others, who may subsequently use them as a basis for further socially-  
326 induced innovations, resulting in a cascade of innovations. Altogether, socially induced  
327 innovation, which can only act in the presence of high-magnitude independent innovation,  
328 selects here against high-magnitude independent innovators, and by lowering their  
329 frequency makes their role, as initiators of the innovation cascade, more crucial. In other  
330 words, it makes them keystone individuals.

331  
332 The definition of keystone individuals, as discussed by Modlmeier et al [4], asserts that  
333 keystones cannot be “generic”: if removed, their niche cannot simply be filled by others. In  
334 the model presented here, individuals may be genetically identical, but few may, by chance,  
335 produce a high-magnitude independent innovation, while others may copy it and modify it.  
336 Their role as keystones is determined based on the result of their actions. Their  
337 independent innovations are a product of probability, and within a generation lifetime do  
338 not depend on whether others may have or may not have produced high-magnitude  
339 independent innovations of their own. Thus, the removal of a specific keystone individual

340 would indeed not result in another individual in the population producing a high-  
341 magnitude innovation in its place.

342  
343 The results of the model provide, through proof of concept, insight into the co-evolution of  
344 independent and socially induced innovation. As human technology is undoubtedly made  
345 of cascades of innovations [32], the finding that socially induced innovations may select  
346 against independent innovation is highly relevant, and fits nicely with results of models  
347 that combine these two types of innovations, to demonstrate how human culture may have  
348 evolved in “bursts”, composed of initial ‘lucky leap’ innovations that are followed by further  
349 innovations that are inspired by the leap [21–23]. Furthermore, the results presented here  
350 demonstrate how socially induced innovation may help maintain independent innovations,  
351 or lucky leaps, at a low frequency, when it is tough to gauge the payoff of a behaviour  
352 without first-hand experience (see discussion of selectivity above).

353  
354 While the model aims to be general, cumulative culture in nonhuman animals, to the extent  
355 that it exists, is difficult to track. Some exceptions to this rule, however, are bird song [29],  
356 and whale song [33], where populations have been documented evolving unique vocal  
357 repertoires. Studies in bird song suggest possible costs to song innovation (e.g. the signal  
358 not conveying the signaler’s intended information [29]), as well as benefits (adjusting song  
359 to new ecological circumstances, e.g. songs that travel better in an urban environment [34–  
360 36]). They also suggest that innovations often arise through copying errors [29]. This is  
361 especially interesting in the context of socially induced innovation, as a novel song (i.e. an  
362 innovation), only performed by a single individual, would seem more likely to be replicated



363 with errors by listeners (i.e. lead to socially induced innovation), compared to a song  
364 performed by many in the population (i.e. the mean behaviour).

365

366 Is the concept of keystone individuals conducive to our understanding of the evolution of  
367 culture? What if, for example, individuals were induced to innovate by copying any  
368 innovation, regardless of its magnitude? In such a case, socially induced innovations would  
369 have no benefit over independent innovations: if the original innovation they innovate  
370 upon is not of high value, socially induced innovations are just as likely to result in below-  
371 average behaviour as an independent innovation. Thus, cultural evolution rates with such  
372 indiscriminate socially induced innovations is likely to be the same as in their absence.

373 Having the keystone concept in mind contributed much to the design of the model  
374 presented in this paper, and in turn, to its insight into the possible evolutionary interaction  
375 between independent innovation, socially induced innovation, and innovation magnitude,  
376 and how this interaction can shape the evolution of culture.

377

### 378 **Supporting materials**

379 The Matlab code for the simulations used in this paper has been uploaded as part of the  
380 electronic supplementary material.

381

### 382 **Acknowledgements**

383 I wish to thank two anonymous reviewers for their thoughtful, constructive comments on a  
384 previous version of this manuscript.

385

386 **References**

- 387 1 Paine, R. T. 1969 A note on trophic complexity and community stability. *Am. Nat.*  
388 **103**, 91–93.
- 389 2 Paine, R. T. 1995 A Conservation on refining the concept of keystone species. *Conserv.*  
390 *Biol.* **9**, 962–964.
- 391 3 Mills, L. S., Soulé, M. E. & Doak, D. F. 1993 The Keystone-Species concept in ecology  
392 and conservation, Management and policy must explicitly consider the complexity  
393 of interactions in natural systems. *Bioscience* **Vol. 43**, N, 219–224.
- 394 4 Modlmeier, A. P., Keiser, C. N., Watters, J. V., Sih, A. & Pruitt, J. N. 2014 The keystone  
395 individual concept: An ecological and evolutionary overview. *Anim. Behav.* **89**, 53–62.  
396 (doi:10.1016/j.anbehav.2013.12.020)
- 397 5 Pruitt, J. N., Wright, C. M., Keiser, C. N., DeMarco, A. E., Grobis, M. M. & Pinter-  
398 Wollman, N. 2016 The Achilles' heel hypothesis: misinformed keystone individuals  
399 impair collective learning and reduce group success. *Proc. R. Soc. B Biol. Sci.* **283**,  
400 20152888. (doi:10.1098/rspb.2015.2888)
- 401 6 Pruitt, J. N. & Keiser, C. N. 2014 The personality types of key catalytic individuals  
402 shape colonies' collective behaviour and success. *Anim. Behav.* **93**, 87–95.  
403 (doi:10.1016/j.anbehav.2014.04.017)
- 404 7 Hui, A. & Pinter-Wollman, N. 2014 Individual variation in exploratory behaviour  
405 improves speed and accuracy of collective nest selection by Argentine ants. *Anim.*  
406 *Behav.* **93**, 261–266. (doi:10.1016/j.anbehav.2014.05.006)
- 407 8 Swan, G. J. F., Redpath, S. M., Bearhop, S. & McDonald, R. A. 2017 Ecology of Problem  
408 Individuals and the Efficacy of Selective Wildlife Management. *Trends Ecol. Evol.* **32**,

- 409 518–530. (doi:10.1016/j.tree.2017.03.011)
- 410 9 Arbilly, M., Motro, U., Feldman, M. W. & Lotem, A. 2011 Evolution of social learning  
411 when high expected payoffs are associated with high risk of failure. *J. R. Soc. Interface*  
412 **8**, 1604–1615. (doi:10.1098/rsif.2011.0138)
- 413 10 Rendell, L. et al. 2010 Why copy others? Insights from the social learning strategies  
414 tournament. *Science (80-. )*. **328**, 208–13. (doi:10.1126/science.1184719)
- 415 11 Rendell, L., Fogarty, L. & Laland, K. N. 2010 Rogers’ paradox recast and resolved:  
416 population structure and the evolution of social learning strategies. *Evolution* **64**,  
417 534–48. (doi:10.1111/j.1558-5646.2009.00817.x)
- 418 12 Enquist, M. & Eriksson, K. 2007 Critical Social Learning : A Solution to Rogers ’ s  
419 Paradox of Nonadaptive Culture. *Am. Anthropol.* **109**, 727–734.  
420 (doi:10.1525/AA.2007.109.4.727.728)
- 421 13 Rogers, A. R. 1988 Does biology constrain culture? *Am. Anthropol.* **90**, 819–831.
- 422 14 Franz, M. & Nunn, C. L. 2009 Rapid evolution of social learning. *J. Evol. Biol.* **22**, 1914–  
423 22. (doi:10.1111/j.1420-9101.2009.01804.x)
- 424 15 Aoki, K., Wakano, J. Y. & Feldman, M. W. 2005 The emergence of social learning in a  
425 temporally changing environment: A theoretical model. *Curr. Anthropol.* , 334–340.
- 426 16 Borenstein, E., Feldman, M. W. & Aoki, K. 2008 Evolution of learning in fluctuating  
427 environments: when selection favors both social and exploratory individual learning.  
428 *Evolution (N. Y)*. **62**, 586–602. (doi:10.1111/j.1558-5646.2007.00313.x)
- 429 17 Lehmann, L. & Feldman, M. W. 2009 Coevolution of adaptive technology, maladaptive  
430 culture and population size in a producer-scrounger game. *Proc. Biol. Sci.* **276**, 3853–  
431 62. (doi:10.1098/rspb.2009.0724)

- 432 18 Cavalli-Sforza, L. L. & Feldman, M. W. 1981 *Cultural Transmission and Evolution: A*  
433 *Quantitative Approach*. Princeton, NJ: Princeton University Press.
- 434 19 Boyd, R. & Richerson, P. J. 1985 *Culture and the Evolutionary Process*. Chicago:  
435 University of Chicago Press.
- 436 20 Rogers, E. M. 2003 *Diffusion of Innovations*. 5th edn. New York, New York: Free Press.
- 437 21 Kolodny, O., Creanza, N. & Feldman, M. W. 2015 Evolution in leaps: The punctuated  
438 accumulation and loss of cultural innovations. *Proc. Natl. Acad. Sci.* **112**, E6762–  
439 E6769. (doi:10.1073/pnas.1520492112)
- 440 22 Kolodny, O., Creanza, N. & Feldman, M. W. 2016 Game-Changing Innovations: How  
441 Culture Can Change the Parameters of Its Own Evolution and Induce Abrupt Cultural  
442 Shifts. *PLoS Comput. Biol.* **12**, 1–15. (doi:10.1371/journal.pcbi.1005302)
- 443 23 Creanza, N., Kolodny, O. & Feldman, M. W. 2017 Greater than the sum of its parts?  
444 Modelling population contact and interaction of cultural repertoires. *J. R. Soc.*  
445 *Interface* **14**, 20170171. (doi:10.1098/rsif.2017.0171)
- 446 24 Arbilly, M. & Laland, K. N. 2017 The magnitude of innovation and its evolution in  
447 social animals. *Proc. R. Soc. B Biol. Sci.* **284**, 20162385.  
448 (doi:10.1098/rspb.2016.2385)
- 449 25 Reader, S. M. & Laland, K. N. 2003 *Animal Innovation*. Oxford: Oxford University  
450 Press.
- 451 26 Visalberghi, E. & Fragaszy, D. M. 1995 The behaviour of Capuchin Monkeys, *Cebus*  
452 *apella*, with novel food: the role of social context. *Anim. Behav.* **49**, 1089–1095.  
453 (doi:10.1006/anbe.1995.0137)
- 454 27 Laland, K. N. & Williams, K. 1997 Shoaling generates social learning of foraging

- 455 information in guppies. *Anim. Behav.* **53**, 1161–9.
- 456 28 Allen, J., Weinrich, M., Hoppitt, W. & Rendell, L. 2013 Network-Based Diffusion  
457 Analysis Reveals Cultural Transmission of Lobtail Feeding in Humpback Whales.  
458 *Science (80-. )*. **340**, 485–488.
- 459 29 Slater, P. J. B. & Lachlan, R. F. 2003 Is innovation in bird song adaptive? In *Animal*  
460 *Innovation* (eds S. M. Reader & K. N. Laland), pp. 117–135. Oxford University Press.
- 461 30 Greenberg, R. 2003 The role of neophobia and neophilia in the development of  
462 innovative behaviour of birds. In *Animal Innovation* (eds S. M. Reader & K. N. Laland),  
463 pp. 175–196. Oxford University Press.
- 464 31 Brosnan, S. F. & Hopper, L. M. 2014 Psychological limits on animal innovation. *Anim.*  
465 *Behav.* **92**, 325–332. (doi:10.1016/j.anbehav.2014.02.026)
- 466 32 Basalla, G. 1988 *The Evolution of Technology*. Cambridge: Cambridge University  
467 Press.
- 468 33 Whitehead, H. & Rendell, L. 2015 *The Cultural Lives of Whales and Dolphins*. Chicago:  
469 University of Chicago Press.
- 470 34 Brumm, H. 2004 The impact of environmental noise on song amplitude in a  
471 territorial bird. *J. Anim. Ecol.* **73**, 434–440. (doi:10.1111/j.0021-8790.2004.00814.x)
- 472 35 Templeton, C. N., Zollinger, S. A. & Brumm, H. 2016 Traffic noise drowns out great tit  
473 alarm calls. *Curr. Biol.* **26**, R1173–R1174. (doi:10.1016/j.cub.2016.09.058)
- 474 36 Slabbekoorn, H. & den Boer-Visser, A. 2006 Cities Change the Songs of Birds. *Curr.*  
475 *Biol.* **16**, 2326–2331. (doi:10.1016/j.cub.2006.10.008)
- 476
- 477

478

479 **Figure 1:** Mean frequency of alleles in the socially induced innovation gene,  $C$ , as a function  
480 of social learning selectivity,  $D$ .  $C_0$  allele codes for no socially induced innovation;  $C_1$  allele  
481 codes for certain socially induced innovation;  $C_{sqrt}$  sets the probability of socially induced  
482 innovation to the square root of the probability of independent innovation ( $L$  genotype).  
483 Means and standard errors are calculated for generations 4001-5000, across 100 repeats of  
484 each simulation.

485

486 **Figure 2:** Effect of the socially induced innovation gene,  $C$ , on the frequency and magnitude  
487 of innovation. (a) Mean frequency of independent innovation, based on mean genotype in  
488 the  $L$  gene; (b) Mean magnitude of innovation, among individuals with the genetic potential  
489 of independent and/or socially induced innovation. Means and standard errors are  
490 calculated for generations 4001-5000, across 100 repeats of each simulation.

491

492 **Figure 3:** Effect of socially induced innovation gene,  $C$ , on cumulative culture. Means and  
493 standard errors are calculated over 100 repeats of each simulation.

494

495

496

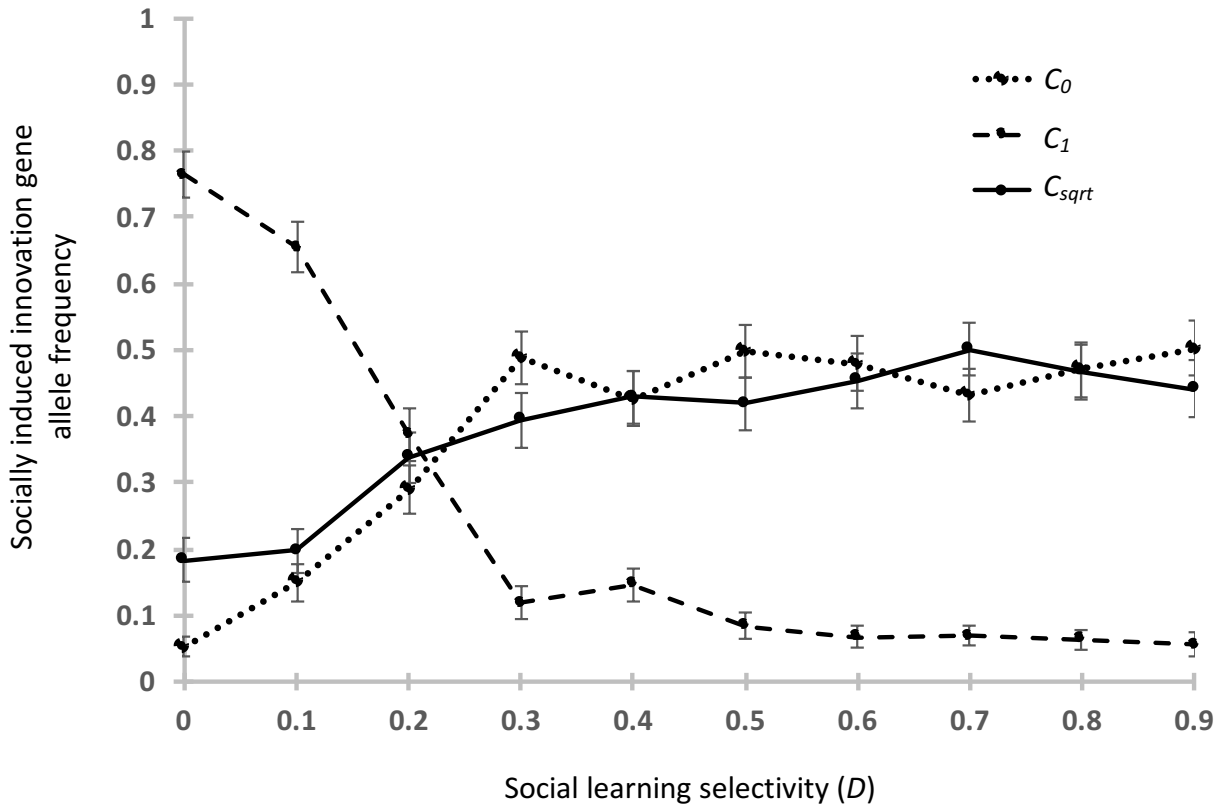

**Figure 1:** Mean frequency of alleles in the socially induced innovation gene,  $C$ , as a function of social learning selectivity,  $D$ .  $C_0$  allele codes for no socially induced innovation;  $C_1$  allele codes for certain socially induced innovation;  $C_{sqr}$  sets the probability of socially induced innovation to the square root of the probability of independent innovation ( $L$  genotype). Means and standard errors are calculated for generations 4001-5000, across 100 repeats of each simulation.

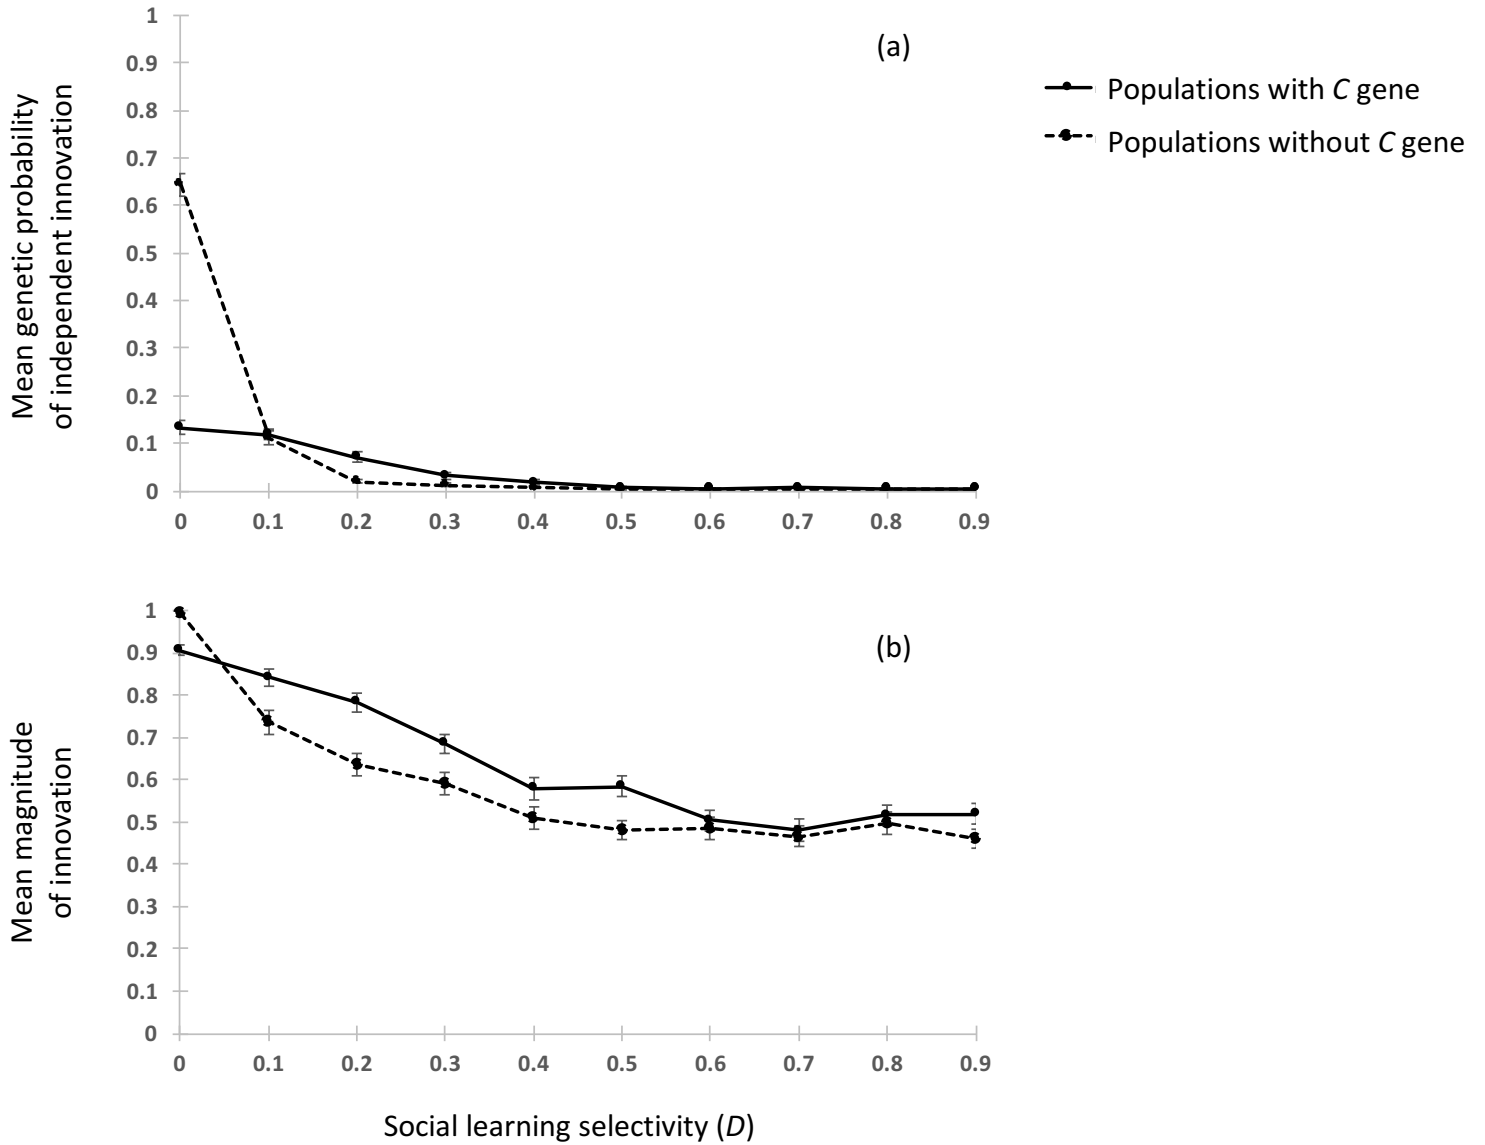

**Figure 2:** Effect of the socially induced innovation gene,  $C$ , on the frequency and magnitude of innovation. (a) Mean frequency of independent innovation, based on mean genotype in the  $L$  gene; (b) Mean magnitude of innovation, among individuals with the genetic potential of independent and/or socially induced innovation. Means and standard errors are calculated for generations 4001-5000, across 100 repeats of each simulation.



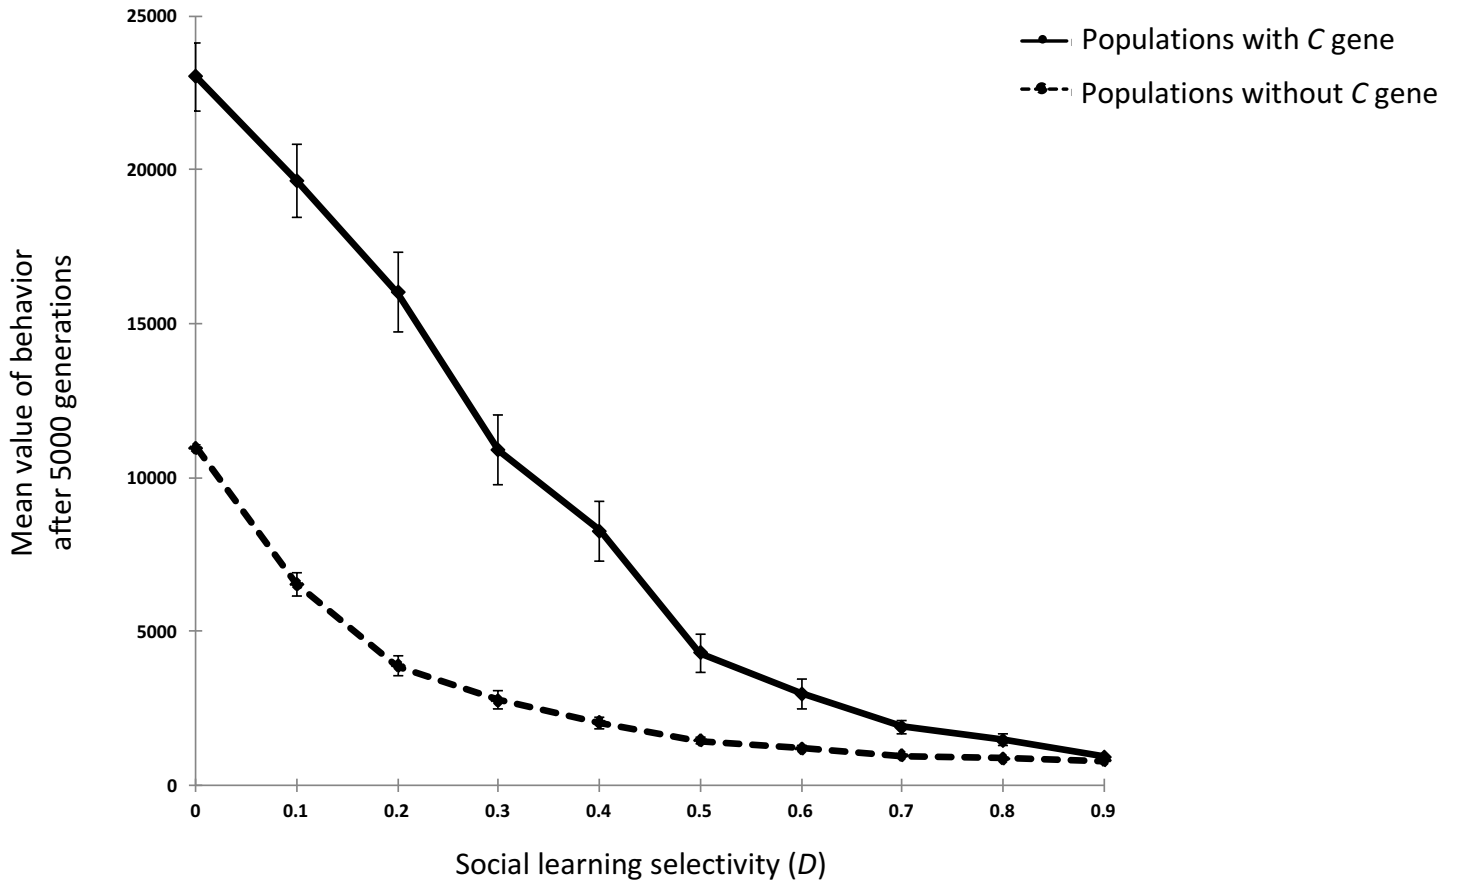

**Figure 3:** Effect of socially induced innovation gene,  $C$ , on cumulative culture. Means and standard errors are calculated over 100 repeats of each simulation.
